# Supplementary material for: A score to estimate the likelihood of detecting advanced colorectal neoplasia at colonoscopy
Source: PubMed Central journal article supplement — Gut. 2014 Jan 2;63(7):1112–9. doi: 10.1136/gutjnl-2013-304965 (PMC4078748; doi:10.1136/gutjnl-2013-304965), 2014-01-02
Supplement: gutjnl-2013-304965-s1.pdf [file gutjnl-2013-304965-s1.pdf]

Supplementary Figure 1 Legend. Receiver-operating characteristic (ROC) curve and corresponding area under the curve (AUC) statistics for the risk score of advanced neoplasia in the validation cohort.

Supplementary Figure 1.

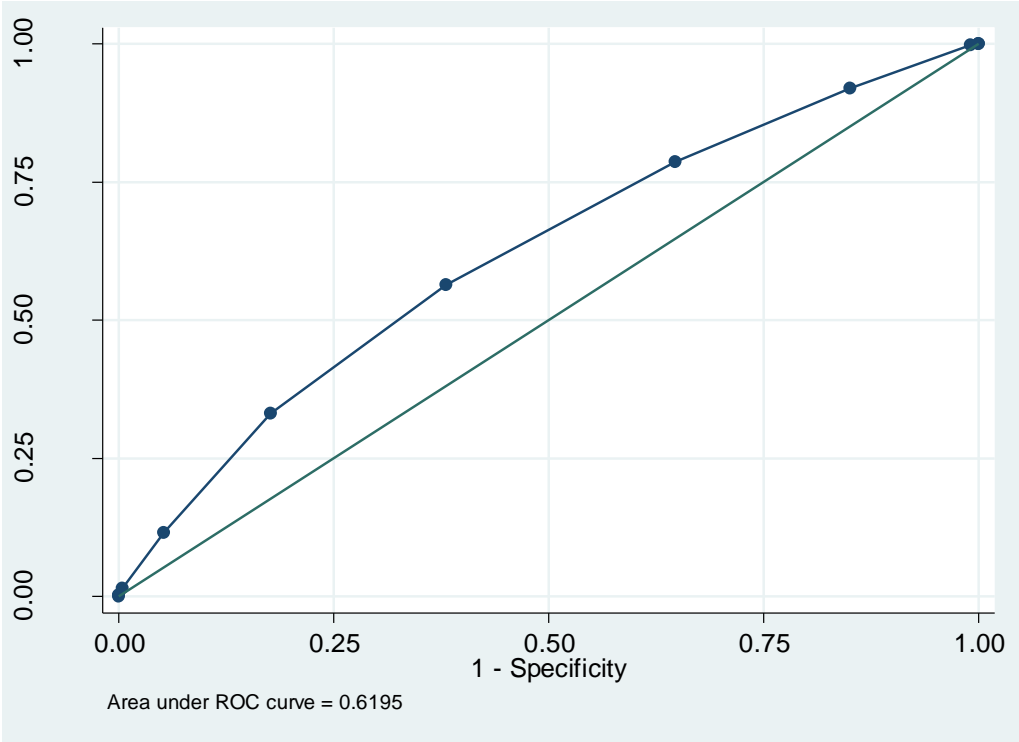

Supplementary Table 1. Expected to observed risk for advanced colorectal neoplasia in the validation data set (N=17,939) by simplified risk score.

| Risk score | Observed risk | Expected risk | Expected to observed ratio | (95% CI)  |
|------------|---------------|---------------|----------------------------|-----------|
| 0          | 2             | 3.1           | 1.57                       | 0.39-6.26 |
| 1          | 95            | 70.1          | 0.74                       | 0.60-0.90 |
| 2          | 165           | 160.4         | 0.97                       | 0.83-1.13 |
| 3          | 284           | 279.7         | 0.99                       | 0.88-1.11 |
| 4          | 290           | 307.4         | 1.06                       | 0.95-1.19 |
| 5          | 274           | 274.5         | 1.00                       | 0.89-1.13 |
| 6          | 134           | 134.0         | 1.00                       | 0.96-1.36 |
| 7 and 8†   | 26            | 27.8          | 1.07                       | 0.73-1.57 |
| Total      | 1,270         | 1,275.3       | 1.00                       | 0.95-1.06 |

\* Advanced neoplasia includes both advanced adenomas and cancers

† Due to small sample risk score 7 and 8 are presented in one row
